# Supplementary material
Source: publisher figshare collection journal article supplement (https://wiley.figshare.com/articles/dataset/_/3566769)
Supplement: Supplementary file 2 [file 1 › appendix-F.htm]

Ecological Archives M079-020-A6


### *Ecological Archives* M079-020-A6

### **Mark Rees and Stephen P. Ellner. 2009. Integral projection models for populations in temporally varying environments. *Ecological Monographs* 79:575–594.**

Appendix F. Perturbations to vital rate functions.

> View / download PDF.

---


[Back to M079-020]
